# Supplementary material
Source: PubMed Central journal article supplement (PMC2042151)

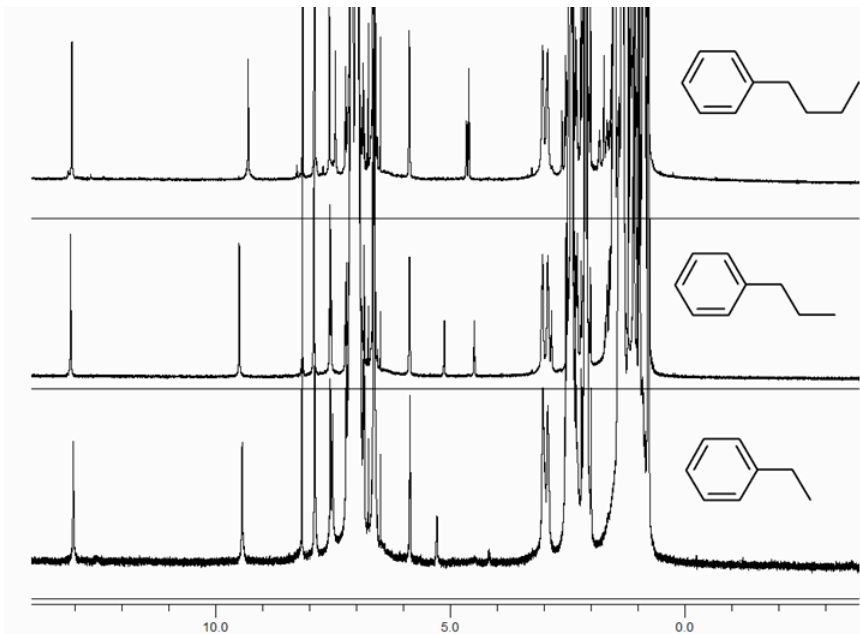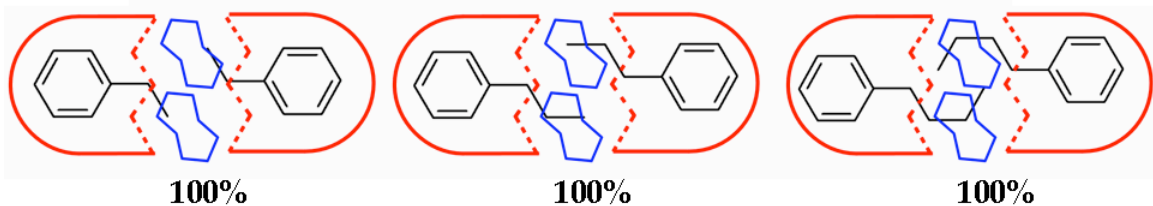

Supplement: pnas_0707759104_1.pdf [file pnas_0707759104_1.pdf]

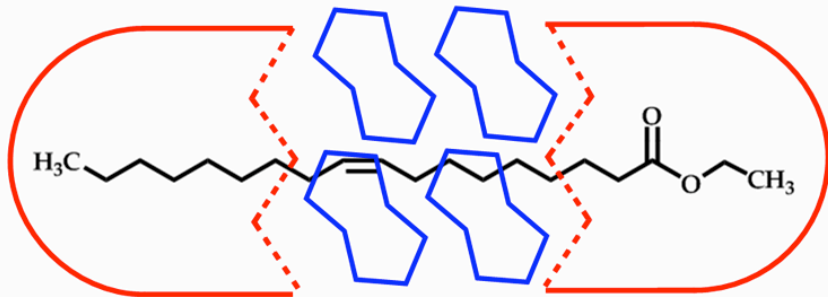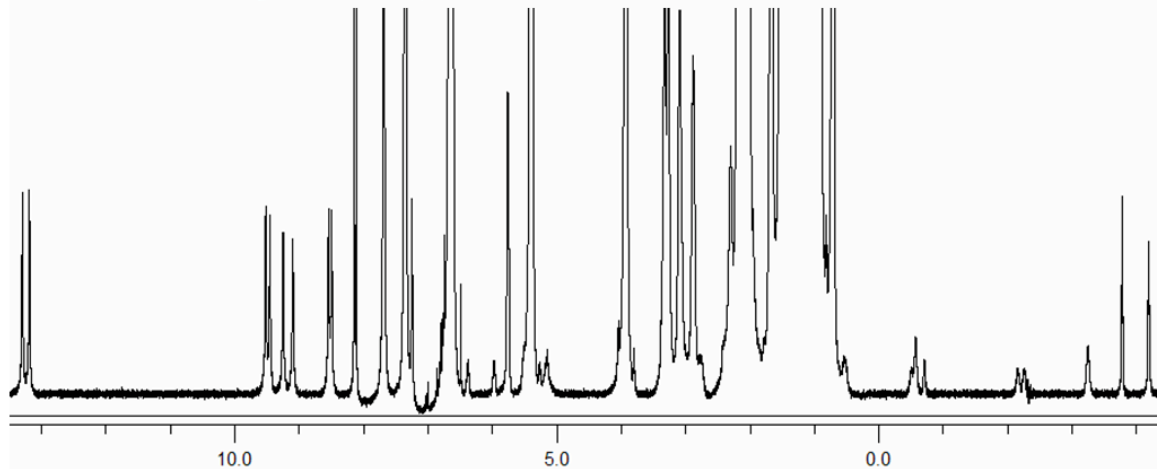

Supplement: pnas_0707759104_12.pdf [file pnas_0707759104_12.pdf]

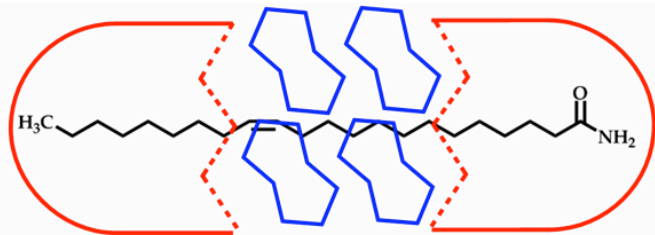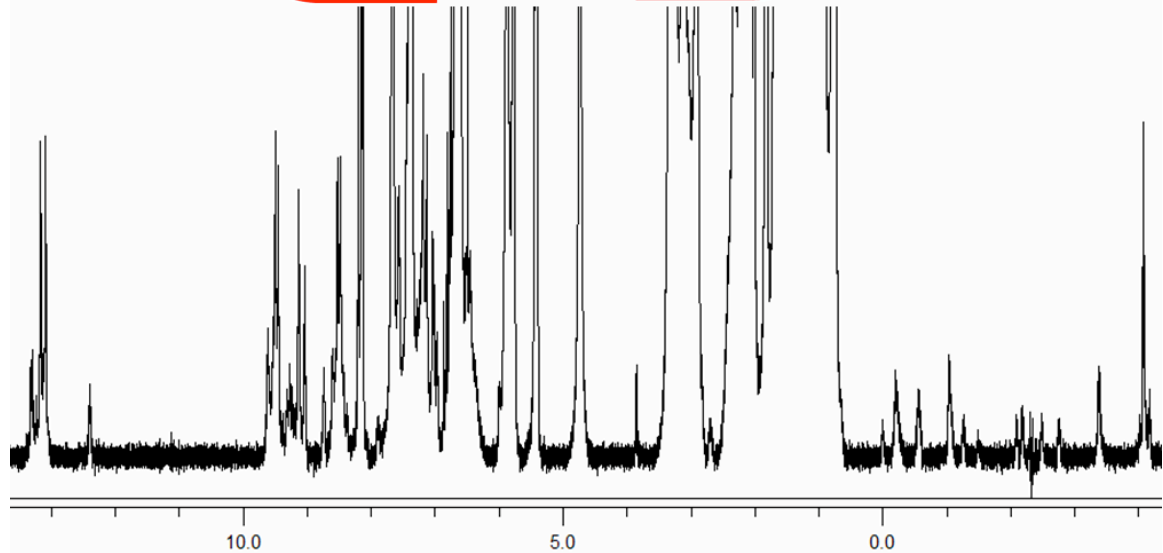

Supplement: pnas_0707759104_13.pdf [file pnas_0707759104_13.pdf]

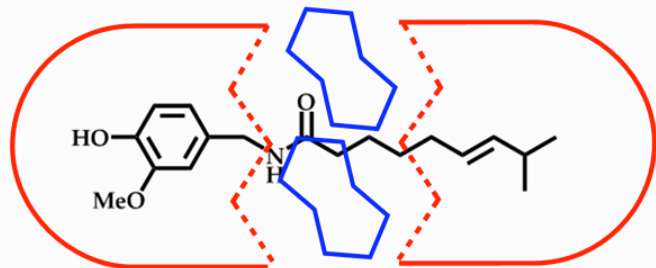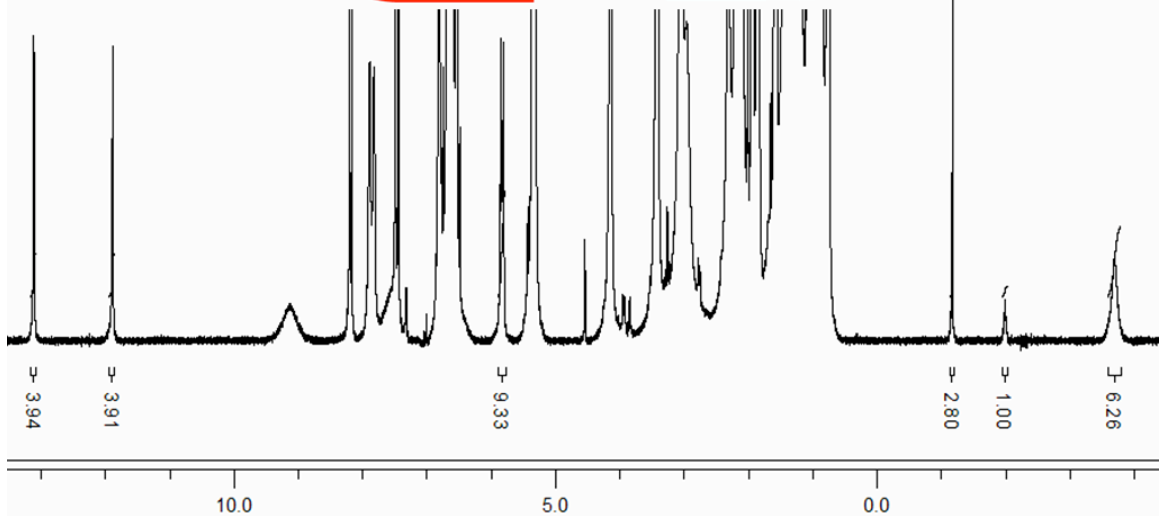

Supplement: pnas_0707759104_14.pdf [file pnas_0707759104_14.pdf]

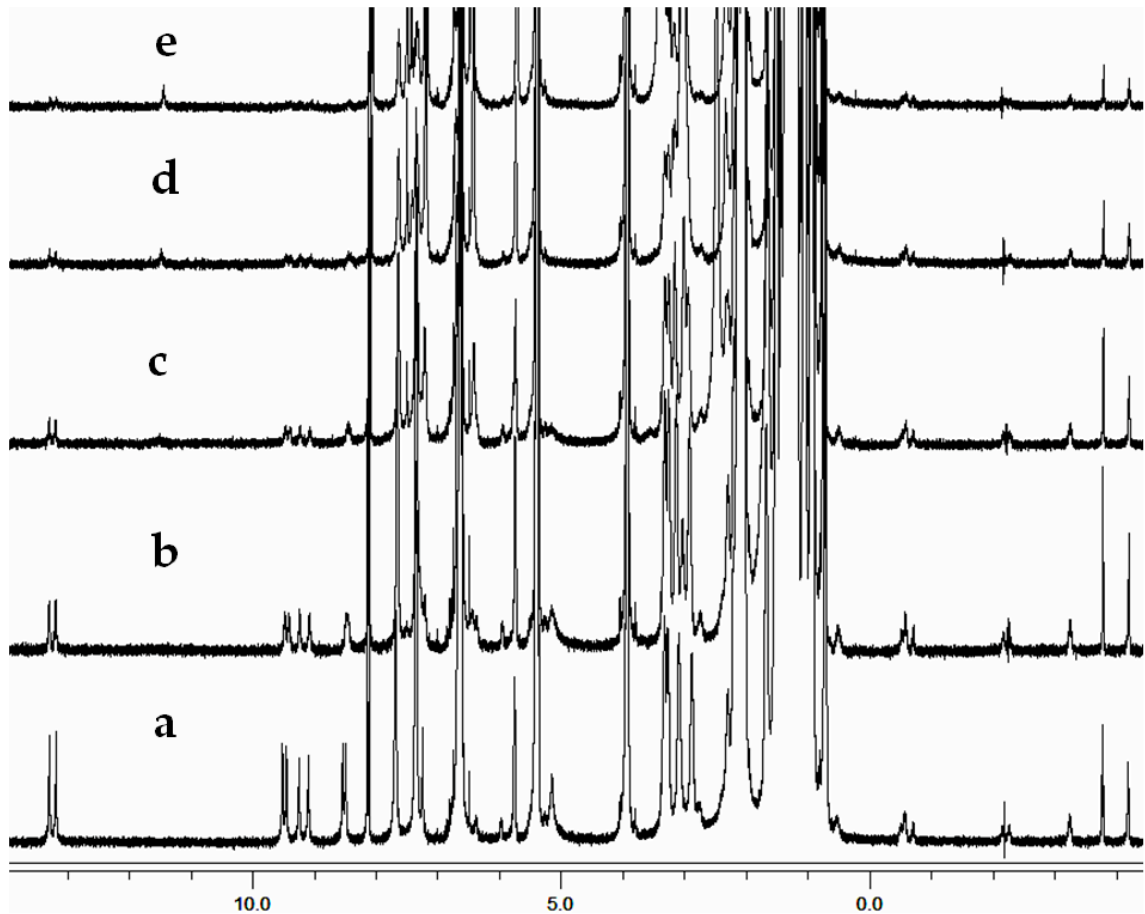

Supplement: pnas_0707759104_15.pdf [file pnas_0707759104_15.pdf]

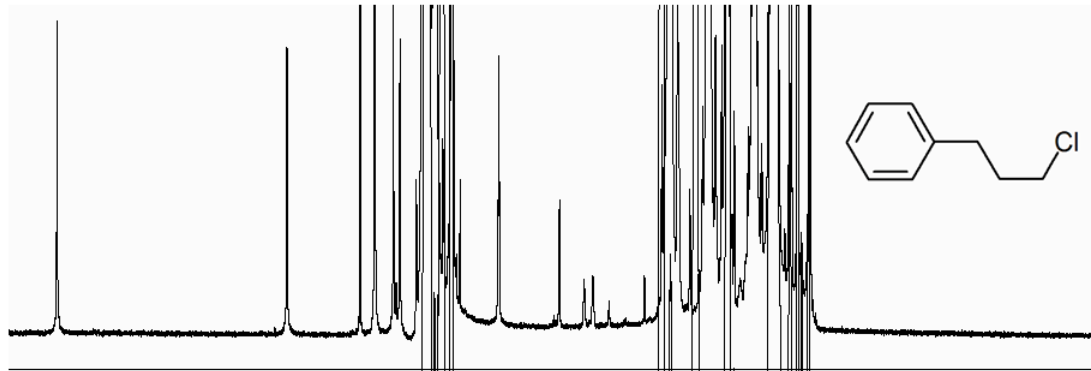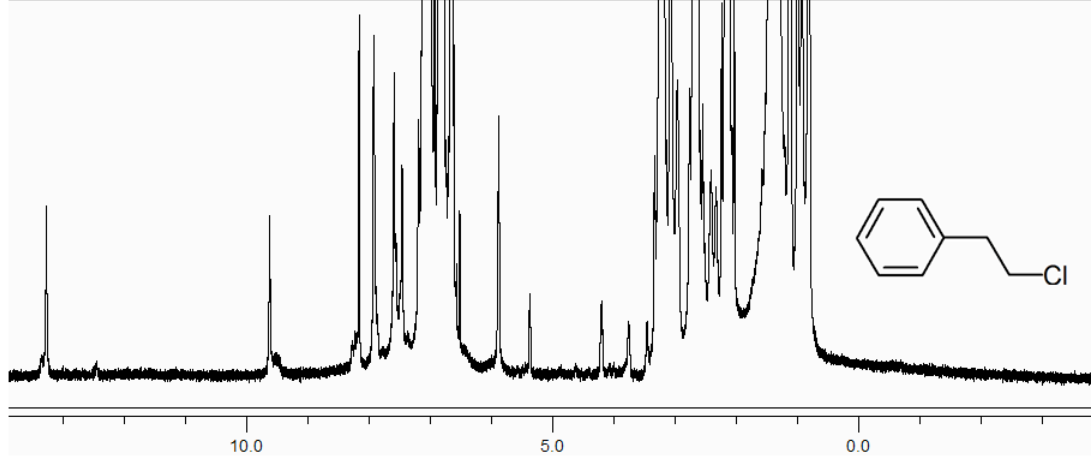

Supplement: pnas_0707759104_3.pdf [file pnas_0707759104_3.pdf]

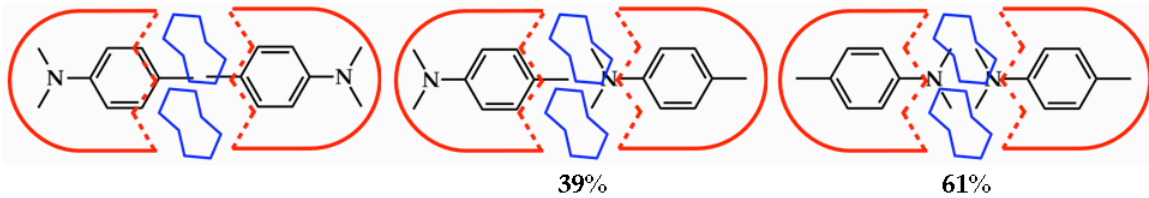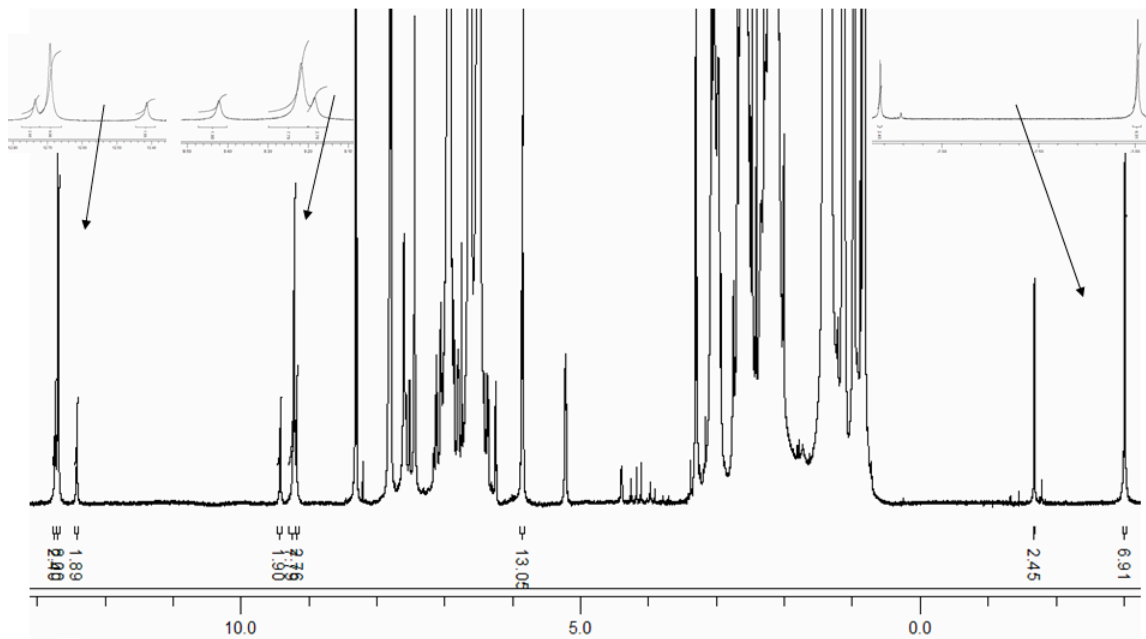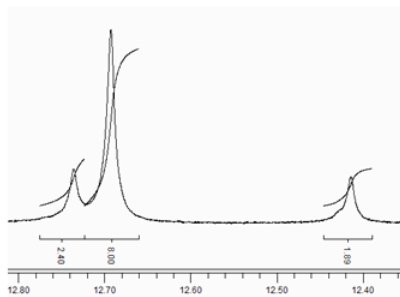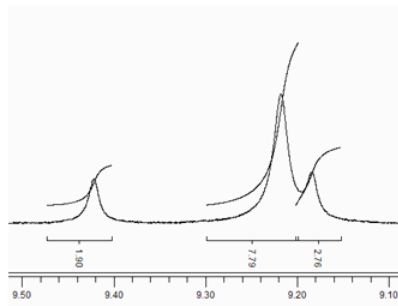

Supplement: pnas_0707759104_4.pdf [file pnas_0707759104_4.pdf]

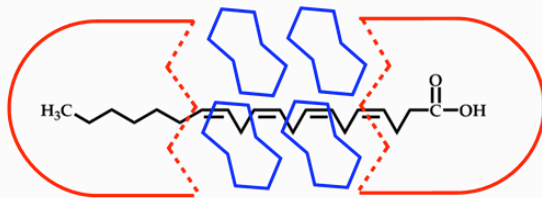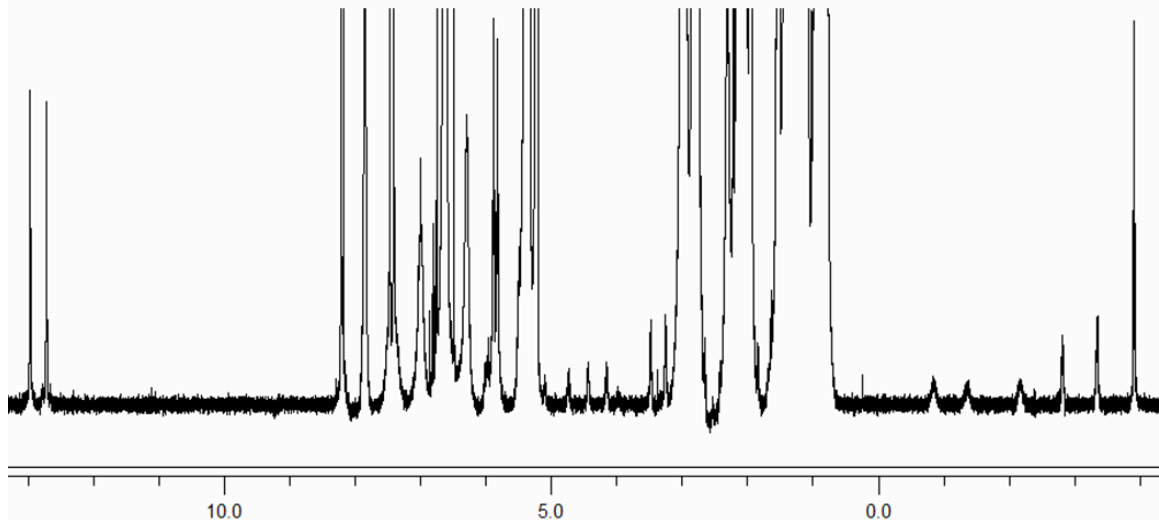

Supplement: pnas_0707759104_5.pdf [file pnas_0707759104_5.pdf]

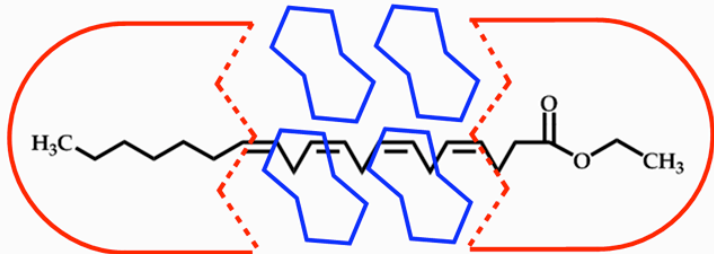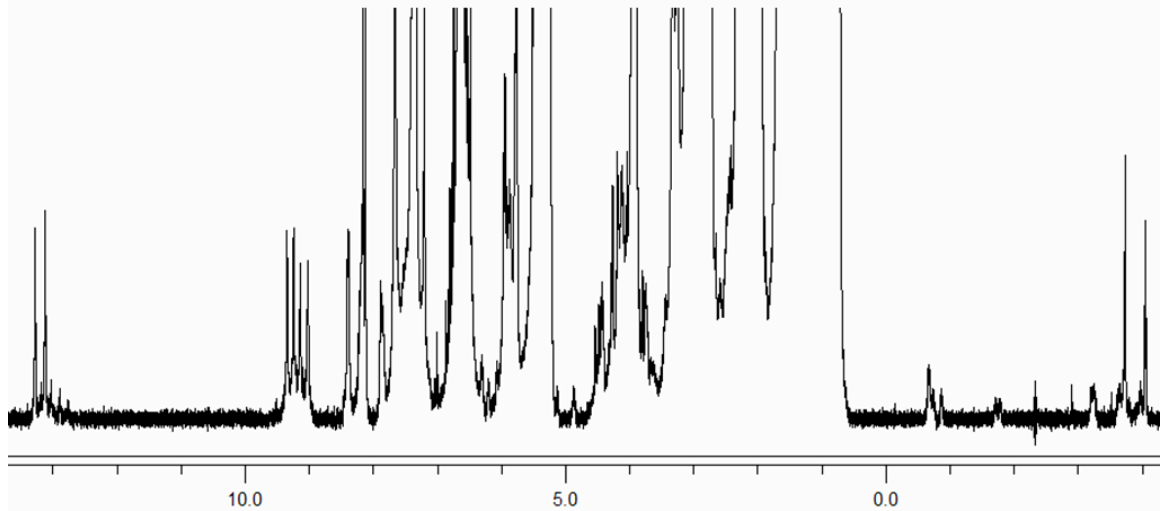

Supplement: pnas_0707759104_6.pdf [file pnas_0707759104_6.pdf]
